# Supplementary material for: Use of Online Forums for Perinatal Mental Illness, Stigma, and Disclosure: An Exploratory Model
Source: PubMed Central journal article supplement (PMC5339438; doi:10.2196/mental.5926), 2017-02-20
Supplement: mental_v4i1e6_app1.pdf [file mental_v4i1e6_app1.pdf]

**Appendix 1. Online survey questions**



## Online survey questions

### Section 1 About you

Please rate the level of psychological problems, stress and/or isolation you had in pregnancy and/or after birth?

None

Mild

Moderate

Severe

Have you talked to any of the following people about these feelings? Please tick all that apply

Partner

Family

Friends

Family Doctor/GP

Midwife

Online forum users

Health visitor

Counsellor/therapist

other

please state

Have you been diagnosed by a healthcare professional as having a psychological problem during pregnancy and/or after birth?

Yes

No

If yes, please state what they said the problem was

Are there any things that make it difficult for you to talk to healthcare providers about how you feel/felt during pregnancy and/or after birth?

No

Yes

if yes please describe

Are you receiving or have you received any of the following treatments in the time around the birth of your child? please tick all that apply

Mother and baby unit

Counselling

Medication

Cognitive Behavioural Therapy (CBT)

Online self-help

other

please state

Section 2 What do you think about psychological problems during pregnancy and after birth?

The City Mental Illness Stigma Scale (Moore, Ayers & Drey)

We use the term “psychological problems” in this questionnaire to refer to all sorts of distress mothers might experience after having a baby, for example mood problems, depression, anxiety, trauma and obsessive compulsive disorder. Please think of psychological problems to mean whatever you feel comfortable with. We appreciate that some questions may be of a sensitive nature and we thank you for your honesty in helping us better understand how you are feeling.

Please select the amount you agree or disagree with each of the following statements.

|                                                                                                                         | Strongly disagree | Disagree | Agree | Strongly agree |
|-------------------------------------------------------------------------------------------------------------------------|-------------------|----------|-------|----------------|
| 1. I can't cope as well as I'd like with my baby                                                                        | 1                 | 2        | 3     | 4              |
| 2. I have thoughts of hurting myself                                                                                    | 1                 | 2        | 3     | 4              |
| 3. I have thoughts of killing myself                                                                                    | 1                 | 2        | 3     | 4              |
| 4. I have thoughts about leaving my baby                                                                                | 1                 | 2        | 3     | 4              |
| 5. My psychological problems have meant I have lost time with my baby                                                   | 1                 | 2        | 3     | 4              |
| 6. People think mothers with psychological problems can't cope with their babies                                        | 1                 | 2        | 3     | 4              |
| 7. People think mothers with psychological problems don't love their babies                                             | 1                 | 2        | 3     | 4              |
| 8. People think mothers with psychological problems will harm their babies                                              | 1                 | 2        | 3     | 4              |
| 9. People think mothers with psychological problems will harm themselves                                                | 1                 | 2        | 3     | 4              |
| 10. People think mothers with psychological problems will kill themselves                                               | 1                 | 2        | 3     | 4              |
| 11. People think mothers with psychological problems are abnormal                                                       | 1                 | 2        | 3     | 4              |
| 12. I do not want people to know I have psychological problems as they may think I'm a bad mother                       | 1                 | 2        | 3     | 4              |
| 13. I worry that if I told a healthcare provider about my psychological problems the social services would get involved | 1                 | 2        | 3     | 4              |
| 14. I worry that if I told a healthcare provider about my psychological                                                 | 1                 | 2        | 3     | 4              |

problems my baby would be taken away  
15. I worry that if I told a healthcare  
provider about my thoughts they would  
think I am an abusive mother

---

1

2

3

4

### Section 3 What do you think about mental illness in general?

Brief Version of the Internalized Stigma of Mental Illness (ISMI) Scale (Boyd, Otilingam & DeForge, 2014)

### Section 4 About using online forums

How often do you visit forums that discuss mental health in pregnancy or after birth? For example, depression after childbirth, upsetting feelings around birth.

daily

weekly

monthly

never

Please list the forum(s) that you use most often about these issues?

When did you start using these forum(s)?

A week ago

A month ago

6 months ago

A year ago

Over a year ago

How often do you read posts on these forums?

daily

weekly

monthly

never

How often do you start a conversation/thread on these forums?

daily

weekly

monthly

never

How often do you reply to conversations/thread posted by other members?

- daily
- weekly
- monthly
- never

What are the main reasons you visit these forums?

### Section 5 How you feel now

Hospital Anxiety and Depression Scale (Zigmond & Snaith, 1983)

### Part 6 Tell us about yourself

What is your age?

What is your child's/children's date of birth?

Which category best describes you?

- White
- Hispanic or Latino
- Black or African American
- Native American or American Indian
- Asian / Pacific Islander
- Other please state

What is your country of residence?

What is your current marital status?

- Single, never married
- Married
- Living with partner
- Divorced

Widowed

Separated

other

Are you currently?

Employed for wages

Self-employed

Out of work and looking for work

Out of work but not currently looking for work

A homemaker

A student

Military

Unable to work

What is the highest level of education you have completed?

GCSEs

A levels

Trade/technical/vocational training

Bachelor's degree

Master's degree

Doctorate degree
